# Supplementary material for: Ultrasmall water-stable CsPbBr3 quantum dots with high intensity blue emission enabled by zeolite confinement engineering
Source: Royal Society of Chemistry journal article supplement (doi:10.1039/d3mh01092a), 2023-01-01
Supplement: d3mh01092a1.pdf [file d3mh01092a1.pdf]

## Electronic Supplementary Information

### Ultrasmall Water-stable CsPbBr<sub>3</sub> Quantum Dots with High Intensity Blue Emission Enabled by Zeolite Confinement Engineering

Hongyue Zhang,<sup>‡a,b</sup> Bolun Wang,<sup>‡a,b</sup> Zijian Niu,<sup>a</sup> Guangrui Chen,<sup>a</sup> Buyuan Guan,<sup>a</sup> Jiyang Li,<sup>a\*</sup> and Jihong Yu<sup>a,b\*</sup>

a. State Key Laboratory of Inorganic Synthesis and Preparative Chemistry, College of Chemistry, Jilin University, Changchun 130012, P. R. China.

b. International Center of Future Science, Jilin University, 2699 Qianjin Street, Changchun 130012, P. R. China.

\* Corresponding authors. E-mail: [lijiyang@jlu.edu.cn](mailto:lijiyang@jlu.edu.cn); [jihong@jlu.edu.cn](mailto:jihong@jlu.edu.cn)

## **Materials and Methods**

### **Materials**

All reagents were used without further purification. CsBr and PbBr<sub>2</sub> were purchased from Aladdin Industrial Corporation. Silicon tetraacetate and tetrapropylammonium hydroxide were purchased from Innochem Corporation. Sodium tungstate dihydrate (Na<sub>2</sub>WO<sub>4</sub>•2H<sub>2</sub>O) and tetramethoxysilane were purchased from Aladdin Industrial Corporation. The ultrapure water was obtained from Milli-Q purification equipment.

### **Instruments**

The transmission electron microscopy (TEM) and scanning TEM (STEM) images were taken on a Tecnai F20 electron microscope. Scanning electron microscopy (SEM) images were performed on a JSM-6510 (JEOL) electron microscope. The steady-state spectra and delayed photoluminescence spectra were measured using a HORIBA Scientific FluoroMax-4 spectrofluorometer. The quantum yields (QYs) were collected on an Edinburgh FLS920 with an integrating sphere. The FTIR absorption spectra were measured on a PerkinElmer spectrum 430 FT-IR spectrometer in the range of 400 to 4000 cm<sup>-1</sup> with KBr pellets and corrected baseline after measurement. UV-vis adsorption spectra were measured by a Shimadzu UV-2550 spectrophotometer. The <sup>29</sup>Si MAX NMR spectra were measured on a Bruker AVANCE III 400 MHz NMR spectrometer.

### **Synthesis of W-S-1 zeolite**

W-S-1 zeolite was synthesized on the basis of reported literature with a few modifications. The synthesis process was as follows: First, 20 g tetraethyl orthosilicate and 23.4 g tetrapropyl ammonium hydroxide were added into A beaker, and stirred for about 2 h until tetraethyl orthosilicate hydrolyzed into transparent solution. In a beaker B, 1.8 g sodium tungstate and 15.8 g ultrapure water were added and stirred until the sodium tungstate dissolved. Then, the solution in beaker B was slowly added into beaker A, and stirred for 4 h. Finally, the solution was loaded into 100 mL Teflon-lined stainless-steel autoclave and crystallized in the oven at 150 °C for 15 h under static conditions. After the reaction, the as-synthesized solid product was centrifuged, washed

for several times, and then dried at 80 °C in the oven. Finally, the sample was calcined at 550 °C for 5 h to remove the organic templates.

#### **Synthesis of CsPbBr<sub>3</sub>@W-S-1 composite**

First, CsBr and PbBr<sub>2</sub> with the same molar ratio were ground to mix evenly. Then, a small amount of CsBr/PbBr<sub>2</sub> mixture was spread on the bottom of the quartz boat, covered with graphite paper, and W-S-1 zeolite powder was placed on the graphite paper to ensure that the CsBr/PbBr<sub>2</sub> powder was not contact with the zeolite directly. After that, the quartz boat was put into the tube furnace, and blew with N<sub>2</sub>. The tube furnace was programmatically heated to 700°C in a speed of 5°C/min, and kept for 30 min at 700°C and then cooled naturally to obtain a kind of white powder. Finally, the as-obtained with white powder was washed with water and ultrasound for 30 min to remove the bulk perovskite attached on the surface of zeolite.

#### **Amino acid modification and silanization of CsPbBr<sub>3</sub>@W-S-1 composite**

The CsPbBr<sub>3</sub>@W-S-1 composite was added to glycine aqueous solution, and drained by a vacuum oven, so that the glycine entered into zeolite channels and coordinated with perovskite, thus stabilizing the perovskite QDs in zeolite. Then amino acid modified CsPbBr<sub>3</sub>@W-S-1 composite was silanized to avoid the loss of glycine in water via the reaction of tetramethyl orthosilicate with zeolite composite in toluene solvent at room temperature for 12-24 h.

## Supplementary Figures and tables

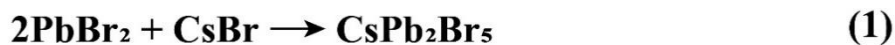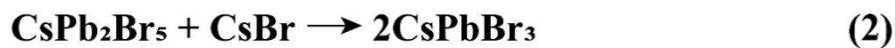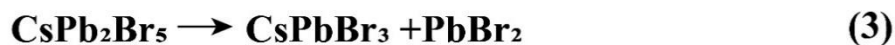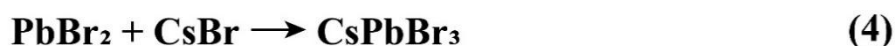

Fig. S1. Reactions during the grinding and high temperature evaporation process.

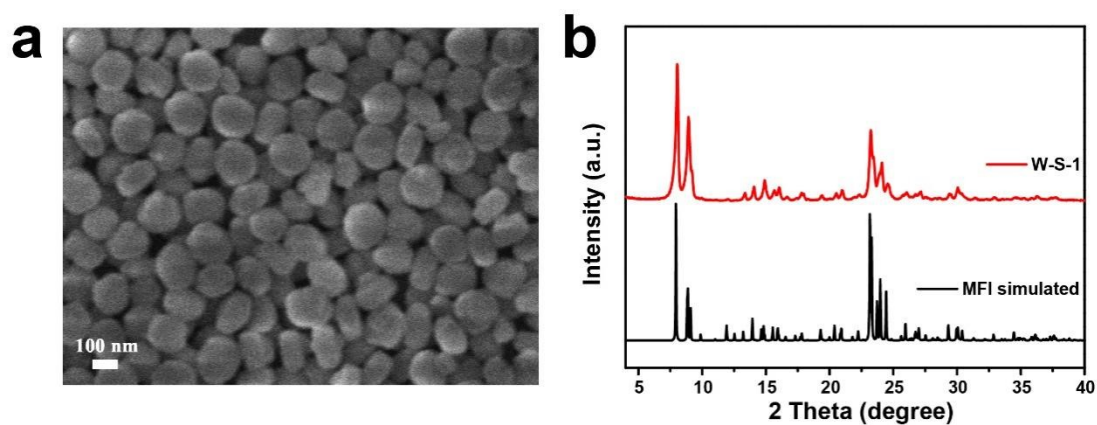

Fig. S2. (a) SEM image and (b) PXRD pattern of W-S-1 zeolite.

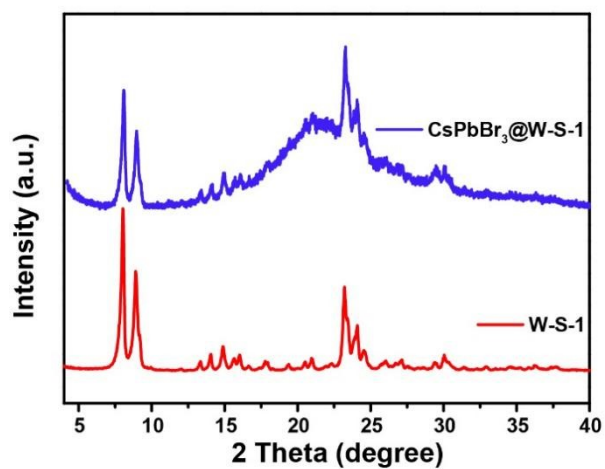

Fig. S3. PXRD patterns of W-S-1 and CsPbBr<sub>3</sub>@W-S-1 composite.

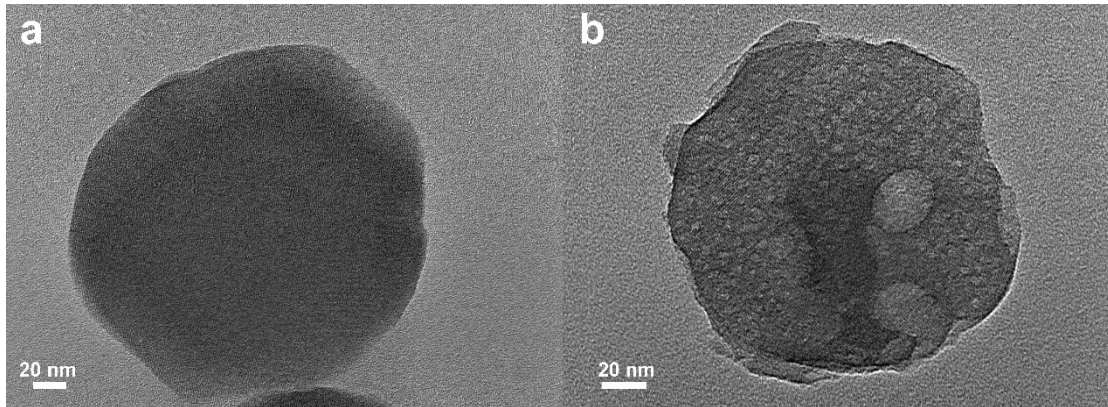

**Fig. S4.** TEM images of (a) W-S-1 and (b) CsPbBr<sub>3</sub>@W-S-1 composite.

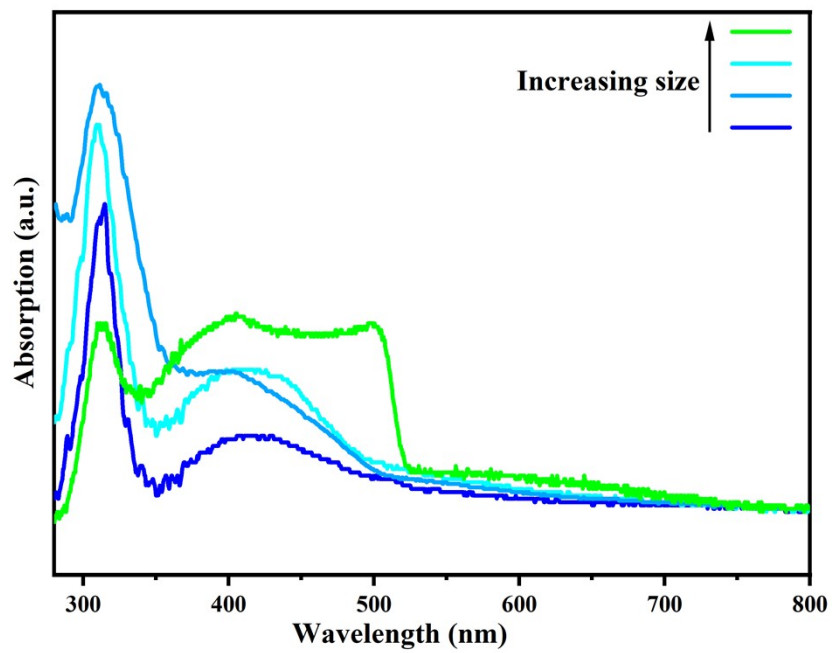

**Fig. S5.** UV-vis absorption spectra of CsPbBr<sub>3</sub>@W-S-1 composites obtained in different conditions.

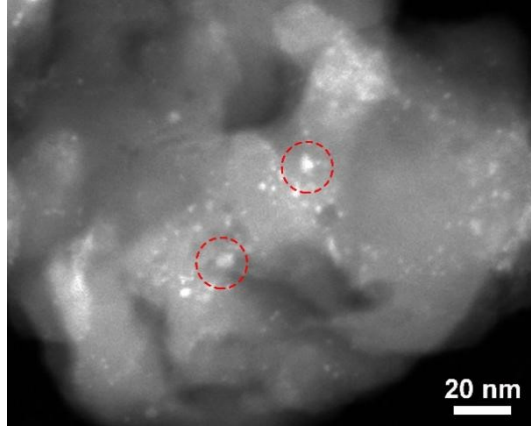

**Fig. S6.** STEM image of CsPbBr<sub>3</sub>@W-S-1 composite.

**Table S1.** Synthetic condition of different sized CsPbBr<sub>3</sub> in zeolite matrix.

| Average Size (nm) | Wavelength (nm) | Lifetime (ns) | CsBr+PbBr <sub>2</sub> (g) | Temperature (°C) | Time (min) |
|-------------------|-----------------|---------------|----------------------------|------------------|------------|
| 2                 | 468             | 5.16          | 0.005                      | 700              | 40         |
| 2.5               | 476             | 6.31          | 0.01                       | 700              | 30         |
| 3.6               | 487             | 8.66          | 0.1                        | 700              | 20         |
| 6                 | 508             | 10.87         | 0.2                        | 700              | 20         |

**Table S2.** The PL emission center and QYs of CsPbBr<sub>3</sub>@W-S-1 composite (before modification and after modification).

| Before modification |         | After modification |         |
|---------------------|---------|--------------------|---------|
| Wavelength (nm)     | QYs (%) | Wavelength (nm)    | QYs (%) |
| 460                 | 11.24   | 468                | 39.32   |
| 474                 | 12.36   | 476                | 48.21   |
| 486                 | 10.95   | 487                | 76.93   |
| 509                 | 28.40   | 508                | 57.71   |
